# Supplementary material for: A study on enhancing the quantum yield and antimicrobial activity of Pr(iii) by varying the coordination environment
Source: Royal Society of Chemistry journal article supplement (doi:10.1039/c7ra13035j), 2018-01-01
Supplement: c7ra13035j1.pdf [file c7ra13035j1.pdf]

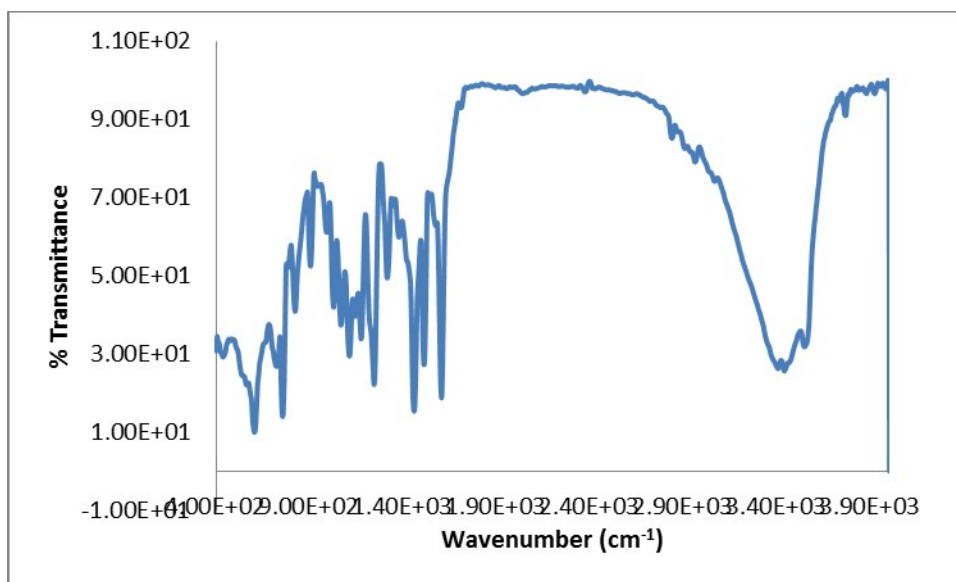

**Figure SI 1(a): FTIR spectral peaks of complex 6**

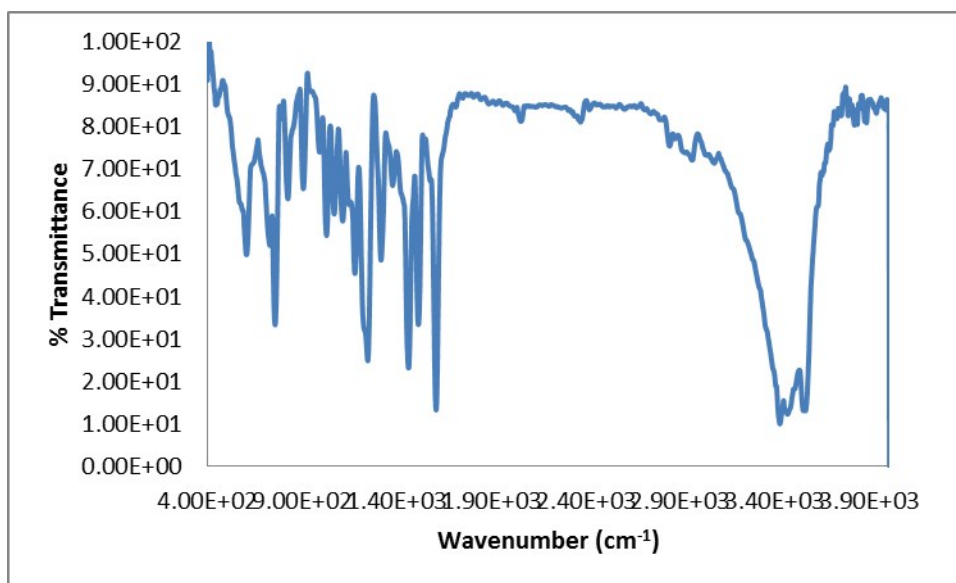

**Figure SI 1(b): FTIR spectral peaks of complex 10**

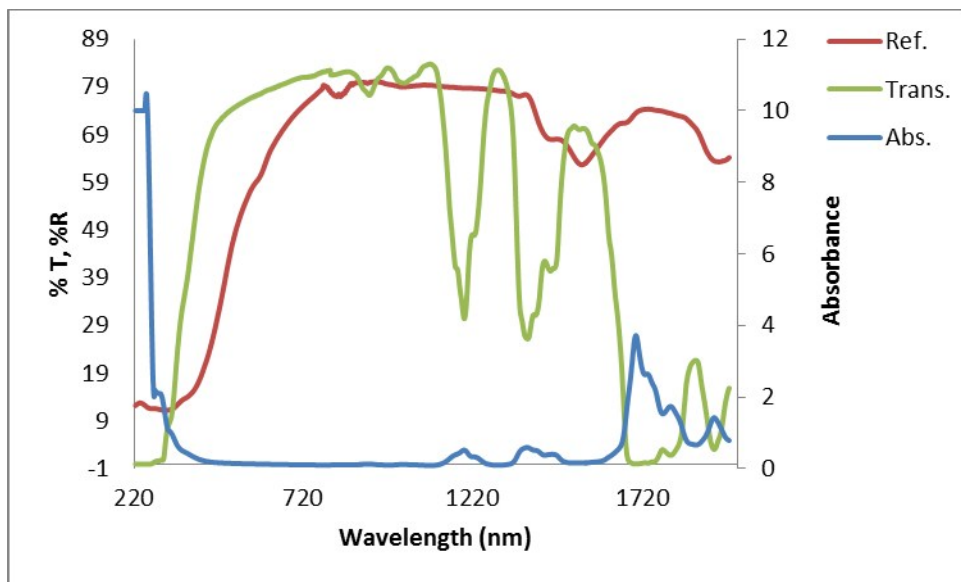

Figure SI 2(a): Absorbance, Transmittance and Reflectance spectra of complex 1

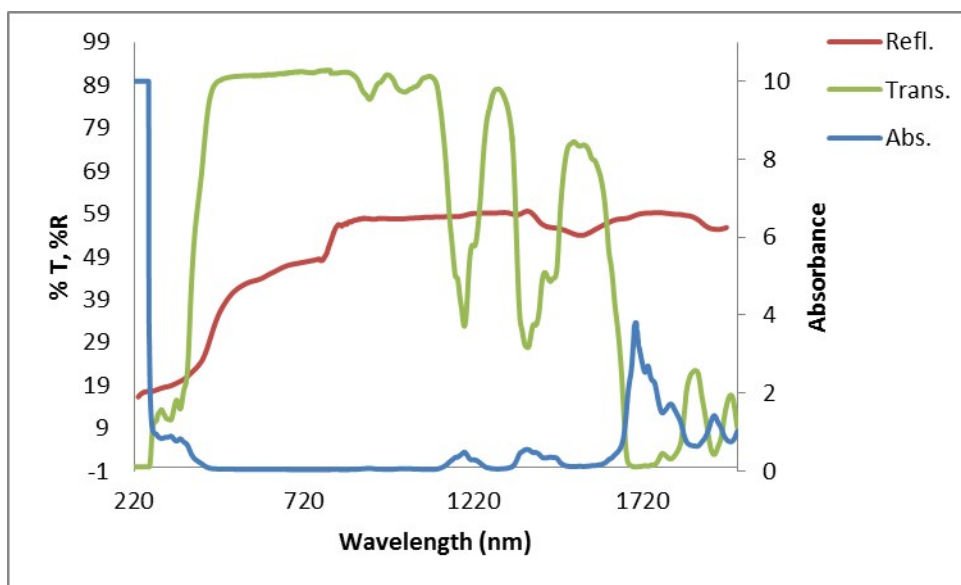

Figure SI 2(b): Absorbance, Transmittance and Reflectance spectra of complex 6

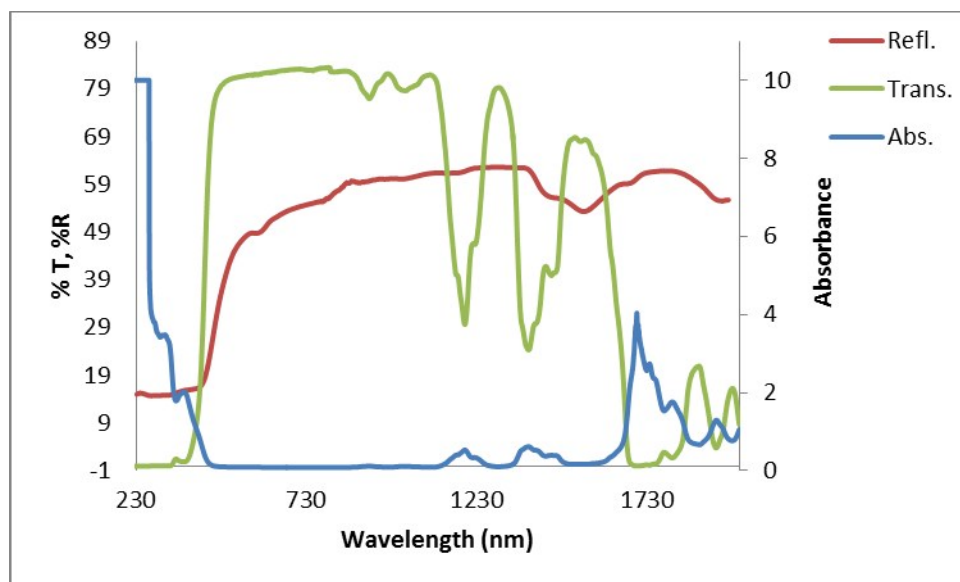

Figure SI 2(c): Absorbance, Transmittance and Reflectance spectra of complex 10

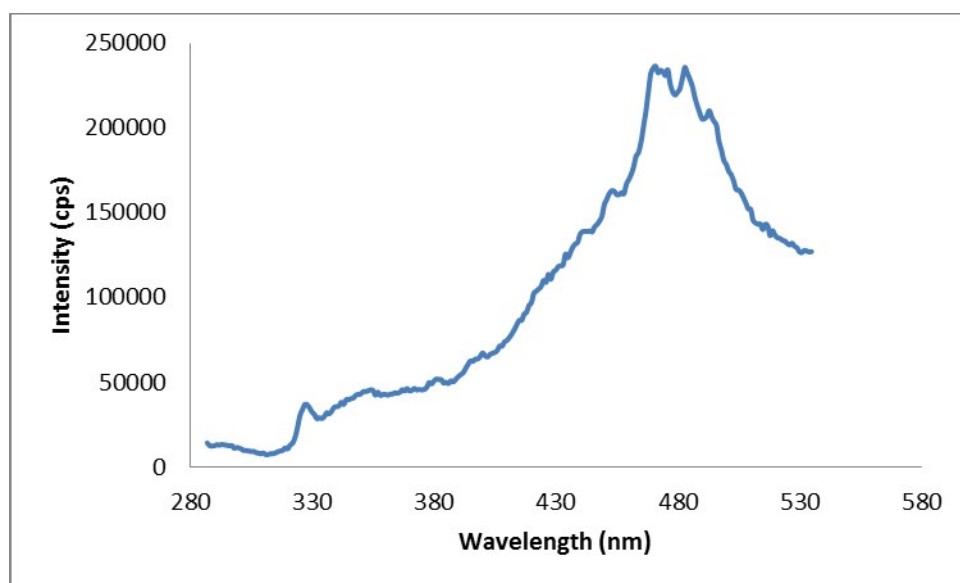

Figure SI 3(a): Solid state fluorescence spectra of complex 2

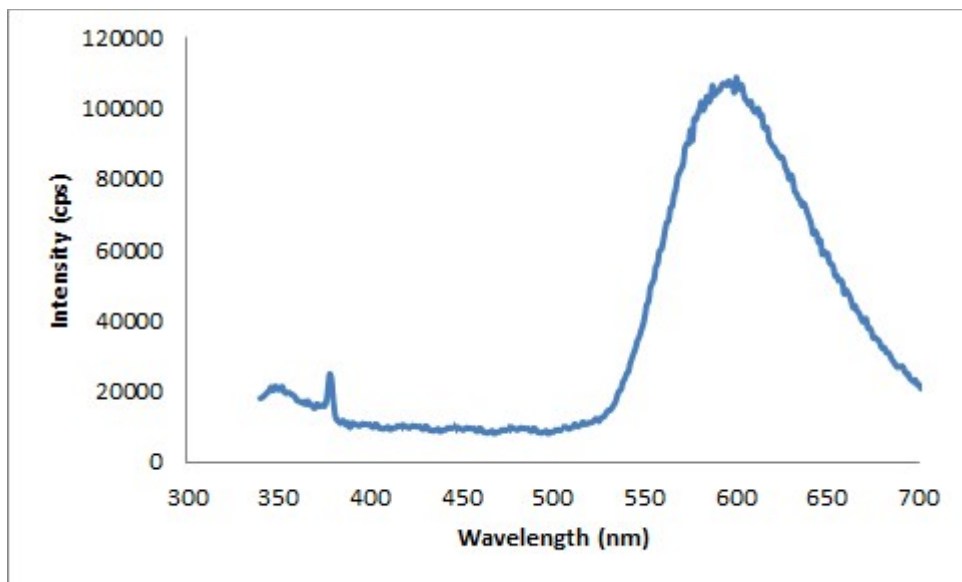

**Figure SI 3(b): Solid state fluorescence spectra of complex 6**

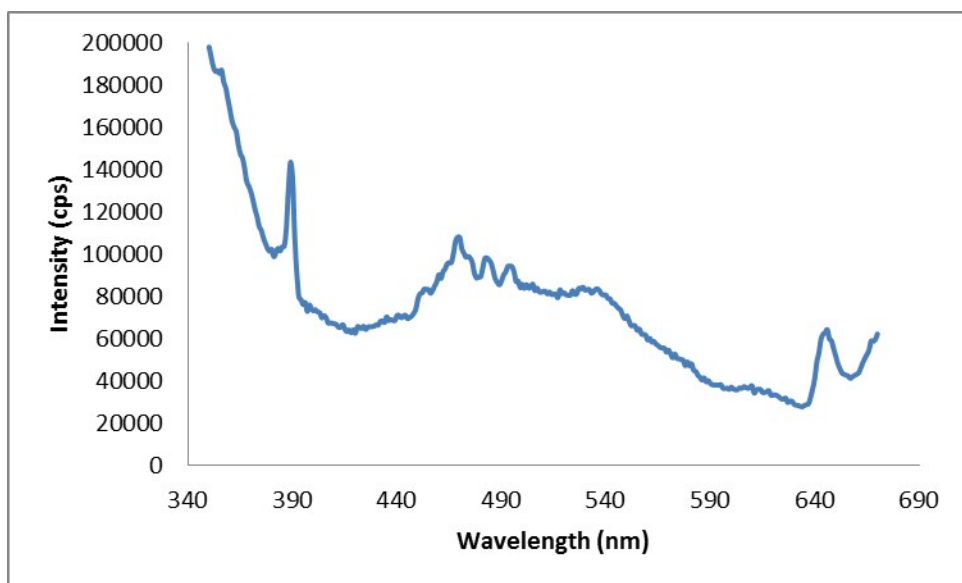

**Figure SI 3(c): Solid state fluorescence spectra of complex 10**
